# Supplementary material for: Catalyst-free growth of two-dimensional hexagonal boron nitride few-layers on sapphire for deep ultraviolet photodetectors
Source: Royal Society of Chemistry journal article supplement (doi:10.1039/c9tc05206b), 2019-01-01
Supplement: c9tc05206b1.pdf [file c9tc05206b1.pdf]

## **Electronic Supplementary Information for**

# **Catalyst-free growth of two-dimensional hexagonal boron nitride few-layers on sapphire for deep ultraviolet photodetectors**

Menglei Gao<sup>a,b</sup>, Junhua Meng<sup>\*c</sup>, Yanan Chen<sup>a,b</sup>, Siyuan Ye<sup>d</sup>, Ye Wang<sup>a,b</sup>, Congyu Ding<sup>a</sup>, Yubo Li<sup>d</sup>, Zhigang Yin<sup>a,b</sup>, Xiangbo Zeng<sup>a,b</sup>, Jingbi You<sup>a,b</sup>, Peng Jin<sup>a,b</sup> and Xingwang Zhang<sup>\*a,b</sup>

<sup>a</sup> Key Lab of Semiconductor Materials Science, Institute of Semiconductors, Chinese Academy of Sciences, Beijing 100083, P. R. China

<sup>b</sup> Center of Materials Science and Optoelectronics Engineering, University of Chinese Academy of Sciences, Beijing 100049, P. R. China

<sup>c</sup> College of Applied Sciences, Beijing University of Technology, Beijing 100124, P. R. China

<sup>d</sup> Key Laboratory of Micro-Nano Electronic Device and Smart System of Zhejiang Province, College of Information Science & Electronic Engineering, Zhejiang University, Hangzhou 310027, P. R. China

E-mail: [jhmeng@semi.ac.cn](mailto:jhmeng@semi.ac.cn), [xwzhang@semi.ac.cn](mailto:xwzhang@semi.ac.cn)

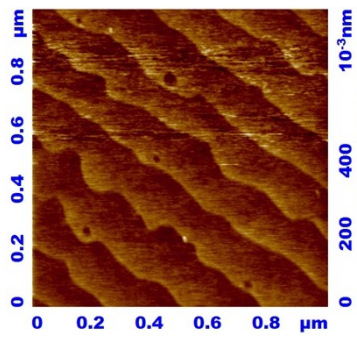

**Fig. S1.** The AFM image of sapphire substrate, showing typical terrace structure.

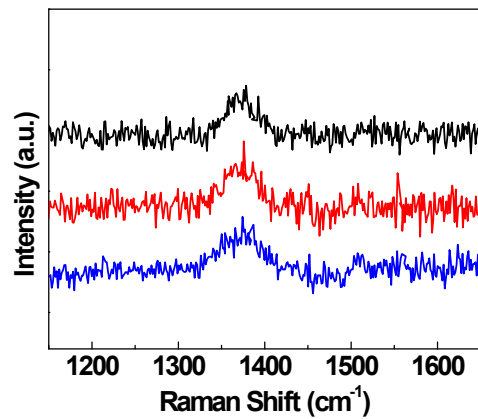

**Fig. S2.** Raman spectra collected from different locations of the h-BN layers directly grown on sapphire by IBSD using Ar ion beam.

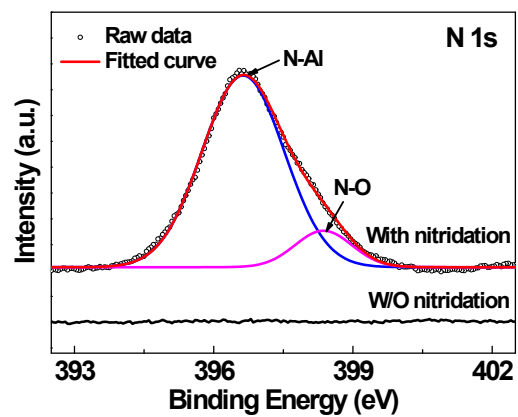

**Fig. S3.** XPS spectra of the sapphire substrate with and without a surface nitridation process.

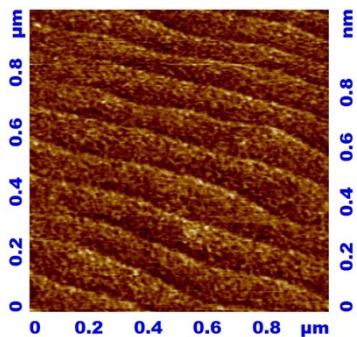

**Fig. S4.** The AFM image of sapphire surface after 10-min surface nitridation. The typical step-terrace structure is still preserved.

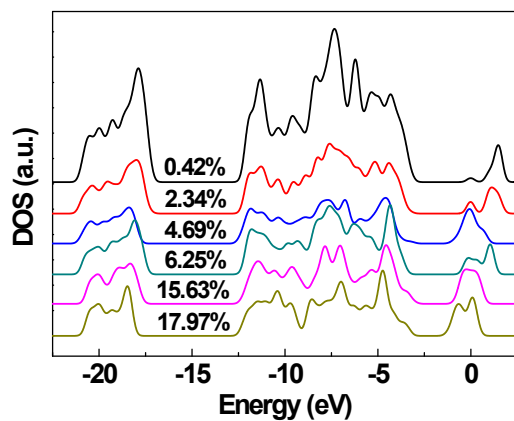

**Fig. S5.** The calculated DOS of h-BN with different N vacancy concentrations.

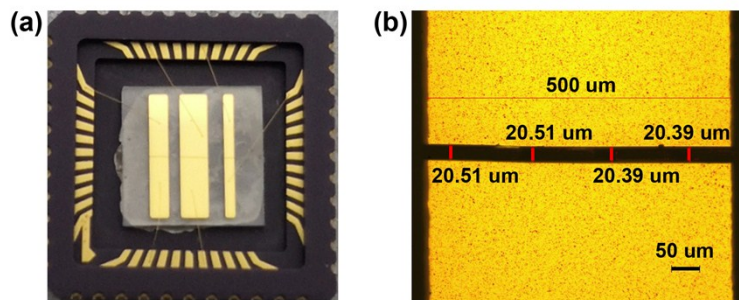

**Fig. S6.** (a) The photograph of the h-BN/sapphire photodetector and (b) the optical microscope image of Ti/Au electrodes. The distance between two adjacent Ti/Au electrodes is about 20  $\mu\text{m}$  and the length is 500  $\mu\text{m}$ .

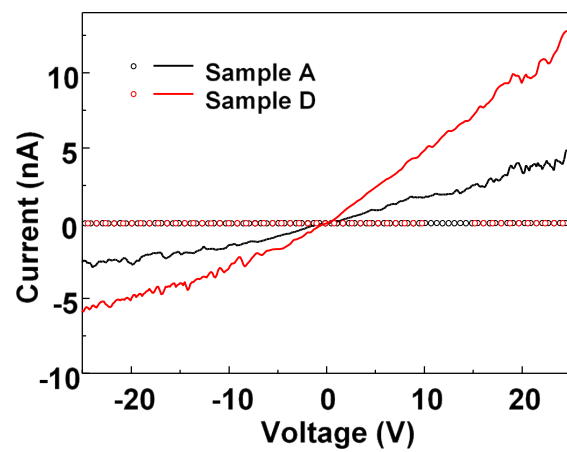

**Fig. S7.** The linear I-V curves of h-BN photodetectors based on sample A and sample D in the dark and under the 212 nm laser illumination.



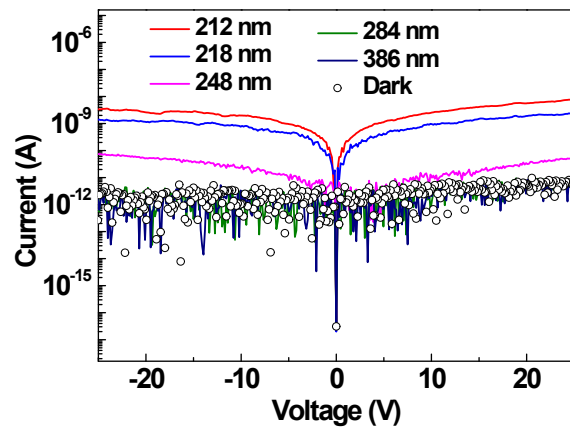

**Fig. S8.** The I-V curves of the h-BN photodetector under laser illumination with different wavelengths.

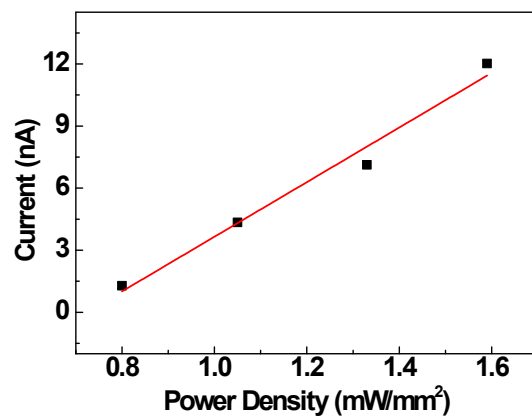

**Fig. S9.** Photocurrent as a function of light intensity under the 212 nm laser illumination at 25 V.

**Table S1.** For the DOS calculations of h-BN with different N vacancy concentrations, the supercell models with different total atomic number and N vacancies were constructed, in which N vacancies were located at the center or near the center of each supercell. The number of N vacancy and the total atomic number of supercells for the different N vacancy concentrations.

| N vacancy concentration | number of N vacancy | total atomic number of supercells |
|-------------------------|---------------------|-----------------------------------|
| 0.42%                   | 1                   | 240                               |
| 0.78%                   | 1                   | 128                               |
| 2.34%                   | 3                   | 128                               |
| 6.25%                   | 8                   | 128                               |
| 10.00%                  | 8                   | 80                                |
| 12.96%                  | 14                  | 108                               |
| 15.63%                  | 20                  | 128                               |
| 17.97%                  | 23                  | 128                               |
